# Supplementary material
Source: MDPI journal article supplement (https://www.mdpi.com/2073-4344/11/8/988)
Supplement: s1 [file s1 › catalysts-1312584-supplementary.pdf]

# Aerobic Oxidative Desulfurization of Liquid Fuel Catalyzed by P–Mo–V Heteropoly Acids in the Presence of Aldehyde

Reem Ghubayra <sup>1,2</sup>, Rachel Hindle <sup>2</sup>, Rana Yahya <sup>3</sup>, Elena F. Kozhevnikova <sup>2</sup> and Ivan V. Kozhevnikov <sup>2,\*</sup>

<sup>1</sup> Department of Chemistry, Faculty of Science, Jazan University, Jazan 45142, Saudi Arabia; rghubayra@jazanu.edu.sa

<sup>2</sup> Department of Chemistry, University of Liverpool, Liverpool L69 7ZD, UK; R.Ghubayra@liverpool.ac.uk (R.G.); sgrhindl@student.liverpool.ac.uk (R.H.); efkozhev@liverpool.ac.uk (E.F.K.)

<sup>3</sup> Department of Chemistry, College of Science, University of Jeddah, Jeddah 23218, Saudi Arabia; ryahiya@uj.edu.sa

\* Correspondence: kozhev@liverpool.ac.uk; Tel.: +44-151-794-2938

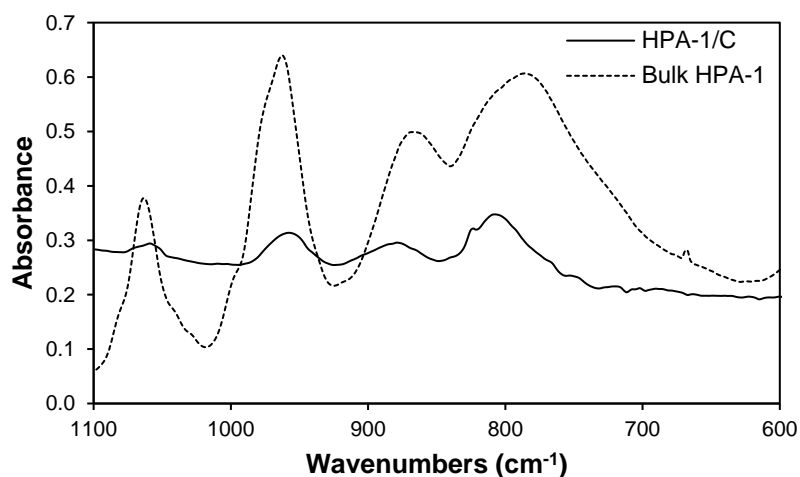

Figure S1. DRIFT spectrum (in KBr) of 15%HPA-1/C and bulk HPA-1.

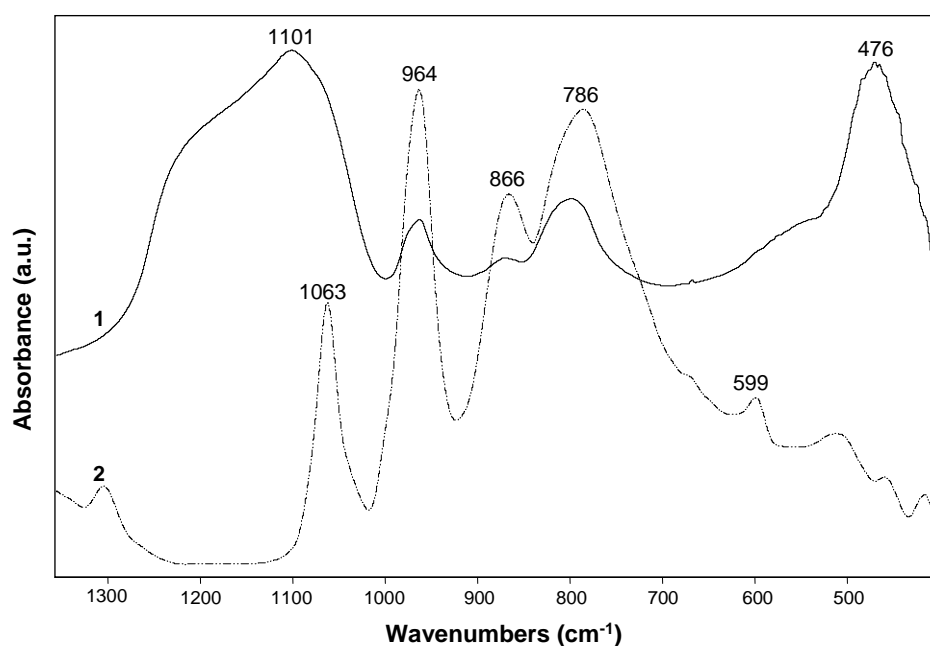

**Figure S2.** DRIFT spectra (in KBr): 15%HPA-1/SiO<sub>2</sub> (1) and bulk HPA-1 (2). Bands at 476 and 1101 cm<sup>-1</sup> belong to silica support. The presence of bands at 786, 866 and 964 cm<sup>-1</sup> in spectrum (1) confirms that the Keggin structure of HPA-1 is intact in 15%HPA-1/SiO<sub>2</sub>.

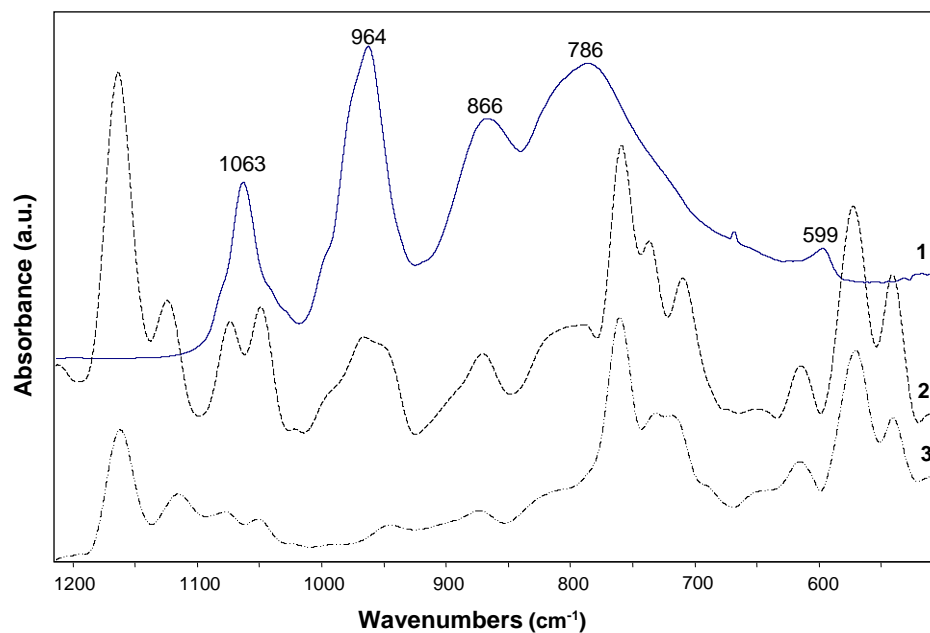

**Figure S3.** DRIFT spectra (in KBr) of fresh and spent HPA-1 catalyst after 5 successive runs: fresh HPA-1 (1), spent HPA-1 catalyst after 5 successive runs (2) and DBT sulfone (3).
